# Supplementary material for: Asperpyrone-Type Bis-Naphtho-γ-Pyrones with COX-2–Inhibitory Activities from Marine-Derived Fungus Aspergillus niger
Source: PubMed Central journal article supplement (PMC6273789; doi:10.3390/molecules21070941), 2016-07-20
Supplement: molecules-21-00941-s001.pdf [file molecules-21-00941-s001.pdf]

# Supplementary Materials: Asperpyrone-Type Bis-Naphtho- $\gamma$ -Pyrone with COX-2-Inhibitory Activities from Marine-Derived Fungus *Aspergillus niger*

Wei Fang, Xiuping Lin, Jianjiao Wang, Yonghong Liu, Huaming Tao and Xuefeng Zhou

**Table S1.**  $^1\text{H}$  NMR spectroscopic data for compounds 1–11.

| No.                  | $\delta_{\text{H}}$ (J in Hz) |                         |                         |                         |                         |                         |                  |                  |                         |                  |                  |
|----------------------|-------------------------------|-------------------------|-------------------------|-------------------------|-------------------------|-------------------------|------------------|------------------|-------------------------|------------------|------------------|
|                      | 1                             | 2                       | 3                       | 4                       | 5                       | 6                       | 7                | 8                | 9                       | 10               | 11               |
| 3                    | 6.08 (s)                      | 3.03, 3.07<br>(d, 17.0) | 2.97, 3.05<br>(d, 17.0) | 6.07 (s)                | 2.97, 3.05<br>(d, 17.0) | 2.89, 2.96<br>(d, 17.0) | 6.36 (s)         | 6.27 (s)         | 6.37 (s)                | 6.00 (s)         | 6.37 (s)         |
| 6                    | /                             | /                       | /                       | /                       | /                       | /                       | 7.08 (s)         | 7.03 (s)         | 7.07 (s)                | /                | 7.00 (s)         |
| 7                    | /                             | /                       | /                       | /                       | /                       | /                       | 7.00 (s)         | 7.19 (s)         | 7.02 (s)                | /                | 7.16 (s)         |
| 9                    | 7.00 (s)                      | 6.72 (s)                | 6.65 (s)                | 7.00 (s)                | 6.70 (s)                | 6.60 (s)                | /                | /                | /                       | 7.04 (s)         |                  |
| 10                   | 7.18 (s)                      | 6.86 (s)                | 7.04 (s)                | 7.15 (s)                | 6.86 (s)                | 6.98 (s)                | /                | /                | /                       | 7.13 (s)         |                  |
| 2-CH <sub>3</sub>    | 2.44 (s)                      | 1.83 (s)                | 1.80 (s)                | 2.43 (s)                | 1.81 (s)                | 1.74 (s)                | 2.51 (s)         | 2.49 (s)         | 2.51 (s)                | 2.38 (s)         | 2.50 (s)         |
| 5-OH                 | 14.86 (s)                     | 14.17 (s)               | 14.27 (s)               | 14.56 (s)               | 14.16 (s)               | 14.17 (s)               | 12.86 (s)        | 12.75 (s)        | 12.80 (s)               | 14.80 (s)        | 12.74 (s)        |
| 6-OCH <sub>3</sub>   | 3.48 (s)                      | 3.44 (s)                | 3.39 (s)                | 3.44 (s)                | 3.40 (s)                | 3.35 (s)                | /                | /                | /                       | 3.64 (s)         | /                |
| 8-OCH <sub>3</sub>   | 3.81 (s)                      | 3.78 (s)                | /                       | 3.84 (s)                | 3.81 (s)                | /                       | 3.81 (s)         | /                | 3.86 (s)                | /                | /                |
| 10-OCH <sub>3</sub>  | /                             | /                       | /                       | /                       | /                       | /                       | 3.45 (s)         | 3.43 (s)         | 3.42 (s)                | /                | 3.65 (s)         |
| 3'                   | 6.01 (s)                      | 6.00 (s)                | 5.90 (s)                | 2.94, 2.96<br>(d, 17.0) | 2.94, 3.01<br>(d, 17.0) | 2.81, 2.93<br>(d, 17.0) | 6.03 (s)         | 6.22 (s)         | 2.95, 3.01<br>(d, 17.0) | 6.31 (s)         | 6.34 (s)         |
| 7'                   | 6.44<br>(d, 2.1)              | 6.43<br>(d, 2.1)        | 6.25<br>(d, 2.1)        | 6.38<br>(d, 2.1)        | 6.37<br>(d, 2.1)        | 6.37<br>(d, 2.1)        | 6.45<br>(d, 2.1) | 6.34<br>(d, 2.1) | 6.40<br>(d, 2.1)        | 6.29<br>(d, 2.1) | 6.28<br>(d, 2.1) |
| 9'                   | 6.23<br>(d, 2.1)              | 6.23<br>(d, 2.1)        | 6.23<br>(d, 2.1)        | 6.14<br>(d, 2.1)        | 6.14<br>(d, 2.1)        | 6.14<br>(d, 2.1)        | 6.21<br>(d, 2.1) | 5.99<br>(d, 2.1) | 6.16<br>(d, 2.1)        | 6.46<br>(d, 2.1) | 6.51<br>(d, 2.1) |
| 2'-CH <sub>3</sub>   | 2.14 (s)                      | 2.15 (s)                | 2.16 (s)                | 1.51 (s)                | 1.50 (s)                | 1.46 (s)                | 2.14 (s)         | 2.19 (s)         | 1.49 (s)                | 2.52 (s)         | 2.58 (s)         |
| 5'-OH                | 15.27 (s)                     | 15.25 (s)               | 15.09 (s)               | 14.82 (s)               | 14.54 (s)               | 14.35 (s)               | 15.27 (s)        | 15.14 (s)        | 14.56 (s)               | 13.44 (s)        | 13.47 (s)        |
| 6'-OCH <sub>3</sub>  | 4.05 (s)                      | 4.04 (s)                | 3.82 (s)                | 4.02 (s)                | 4.02 (s)                | 3.85 (s)                | 4.06 (s)         | 3.90 (s)         | 4.04 (s)                | /                | /                |
| 8'-OCH <sub>3</sub>  | 3.64 (s)                      | 3.66 (s)                | 3.66 (s)                | 3.66 (s)                | 3.66 (s)                | 3.65 (s)                | 3.64 (s)         | 3.69 (s)         | 3.67 (s)                | 3.62 (s)         | 3.64 (s)         |
| 10'-OCH <sub>3</sub> | /                             | /                       | /                       | /                       | /                       | /                       | /                | /                | /                       | 4.00 (s)         | 4.04 (s)         |

**Table S2.** COX-2 inhibitory activities (IC<sub>50</sub>) of compounds 1–11.

| Compounds                          | 1  | 2 | 3    | 4 | 5 | 6   | 7 | 8   | 9 | 10 | 11 | Celecoxib |
|------------------------------------|----|---|------|---|---|-----|---|-----|---|----|----|-----------|
| IC <sub>50</sub> ( $\mu\text{M}$ ) | -* | - | 11.1 | - | - | 4.2 | - | 6.4 | - | -  | -  | 0.011     |

\* - means no obvious activities, IC<sub>50</sub> > 30  $\mu\text{M}$ .
